# Supplementary material
Source: publisher figshare collection journal article supplement (https://karger.figshare.com/articles/dataset/_/9821207)

**Appendix-Table S1. Baseline characteristics stratified race/ethnicity and serum potassium in 16,004 incident PD patients**

|                                   | Non-Hispanic white      |               |               | non-Hispanic black      |               |               | Hispanic                |               |               |
|-----------------------------------|-------------------------|---------------|---------------|-------------------------|---------------|---------------|-------------------------|---------------|---------------|
|                                   | Serum potassium (mEq/L) |               |               | Serum potassium (mEq/L) |               |               | Serum potassium (mEq/L) |               |               |
| Variable                          | <3.5                    | 3.5–5.0       | >5.0          | <3.5                    | 3.5–5.0       | >5.0          | <3.5                    | 3.5–5.0       | >5.0          |
| Patient number                    | 1,479 (15%)             | 7,506 (76%)   | 901 (9%)      | 779 (20%)               | 2,840 (73%)   | 295 (8%)      | 282 (13%)               | 1,666 (76%)   | 256 (12%)     |
| Age (year)                        | 63 ± 14                 | 60 ± 15       | 54 ± 15       | 54 ± 14                 | 51 ± 14       | 47 ± 13       | 55 ± 16                 | 50 ± 16       | 47 ± 15       |
| Female (%)                        | 50                      | 39            | 36            | 61                      | 50            | 46            | 56                      | 43            | 34            |
| DM (%)                            | 57                      | 61            | 61            | 62                      | 63            | 60            | 72                      | 69            | 71            |
| Primary insurance (%)             |                         |               |               |                         |               |               |                         |               |               |
| Medicare                          | 53                      | 49            | 45            | 44                      | 41            | 46            | 48                      | 44            | 43            |
| Medicaid                          | 2                       | 3             | 4             | 3                       | 4             | 6             | 11                      | 11            | 13            |
| Others                            | 45                      | 48            | 51            | 53                      | 55            | 48            | 41                      | 45            | 44            |
| Comorbidities (%)                 |                         |               |               |                         |               |               |                         |               |               |
| Hypertension                      | 53                      | 49            | 51            | 64                      | 62            | 61            | 45                      | 46            | 50            |
| CHF                               | 20                      | 18            | 24            | 21                      | 22            | 29            | 17                      | 18            | 23            |
| ASHD                              | 18                      | 19            | 18            | 16                      | 14            | 12            | 13                      | 13            | 12            |
| Other cardiac disease             | 16                      | 16            | 15            | 13                      | 12            | 13            | 10                      | 12            | 9             |
| Baseline BMI (kg/m <sup>2</sup> ) | 27 (24–32)              | 28 (24–32)    | 27 (23–32)    | 28 (24–34)              | 29 (25–34)    | 27 (24–32)    | 27 (24–32)              | 28 (24–32)    | 28 (24–31)    |
| Baseline laboratory tests         |                         |               |               |                         |               |               |                         |               |               |
| Potassium (mEq/L)                 | 3.2 ± 0.2               | 4.2 ± 0.4     | 5.5 ± 0.4     | 3.2 ± 0.2               | 4.1 ± 0.4     | 5.5 ± 0.4     | 3.2 ± 0.2               | 4.2 ± 0.4     | 5.5 ± 0.5     |
| WBC (× 10 <sup>3</sup> /μL)       | 7.3 (5.9–9.2)           | 7.3 (5.9–8.8) | 7.2 (5.9–8.7) | 6.7 (5.2–8.6)           | 6.3 (5.1–7.8) | 6.4 (5.2–7.9) | 7.2 (5.8–9.3)           | 7.2 (5.9–8.9) | 6.9 (5.8–8.3) |
| Hemoglobin (g/dL)                 | 11.8 ± 1.5              | 11.7 ± 1.5    | 11.7 ± 1.5    | 11.4 ± 1.6              | 11.4 ± 1.6    | 11.5 ± 1.7    | 11.8 ± 1.5              | 11.7 ± 1.6    | 11.7 ± 1.7    |
| Albumin (g/dL)                    | 3.5 ± 0.5               | 3.7 ± 0.5     | 3.8 ± 0.5     | 3.6 ± 0.5               | 3.7 ± 0.5     | 3.8 ± 0.5     | 3.4 ± 0.5               | 3.7 ± 0.5     | 3.7 ± 0.6     |
| Creatinine (mg/dL)                | 5.3 ± 2.3               | 6.3 ± 2.9     | 8.6 ± 4.1     | 7.4 ± 3.3               | 8.6 ± 4.2     | 11.5 ± 5.4    | 5.9 ± 2.7               | 7.6 ± 3.7     | 9.6 ± 4.3     |
| Calcium (mg/dL)                   | 8.8 ± 0.8               | 8.9 ± 0.7     | 8.9 ± 0.8     | 8.8 ± 0.8               | 8.8 ± 0.8     | 8.7 ± 0.8     | 8.6 ± 0.7               | 8.6 ± 0.8     | 8.6 ± 0.8     |
| Phosphorus (mg/dL)                | 4.2 ± 1.2               | 5.0 ± 1.5     | 6.1 ± 1.8     | 4.4 ± 1.3               | 5.0 ± 1.4     | 6.0 ± 1.8     | 4.3 ± 1.3               | 5.2 ± 1.5     | 5.9 ± 1.8     |
| Bicarbonate (mEq/L)               | 27.2 ± 3.1              | 25.4 ± 3.4    | 23.1 ± 3.5    | 26.8 ± 3.0              | 24.8 ± 3.4    | 22.2 ± 3.8    | 26.6 ± 2.9              | 24.7 ± 3.4    | 22.9 ± 4.0    |

Note: continuous values are expressed as mean  $\pm$ SD if normally distributed or median (interquartile range) if skewed.

Abbreviations: DM, diabetes mellitus; CHF, congestive heart failure; ASHD, atherosclerotic heart disease; WBC, white blood cell; BMI, body mass index

**Appendix-Figure S1. Cohort construction**

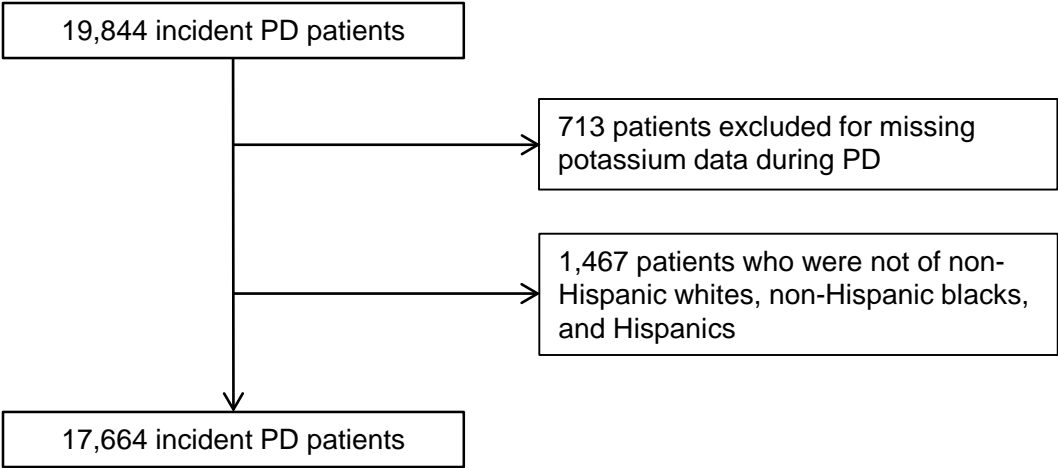

**Appendix-Figure S2. Frequency of serum potassium measurement each month from PD start**

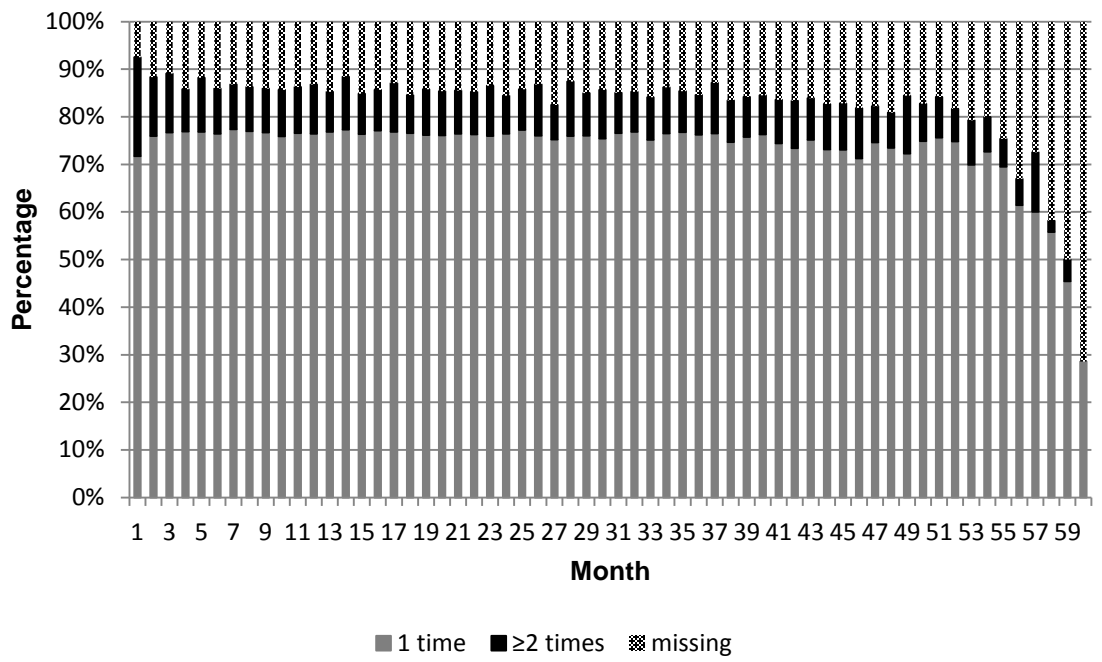

Appendix-Figure S3

**A** Non-Hispanic white

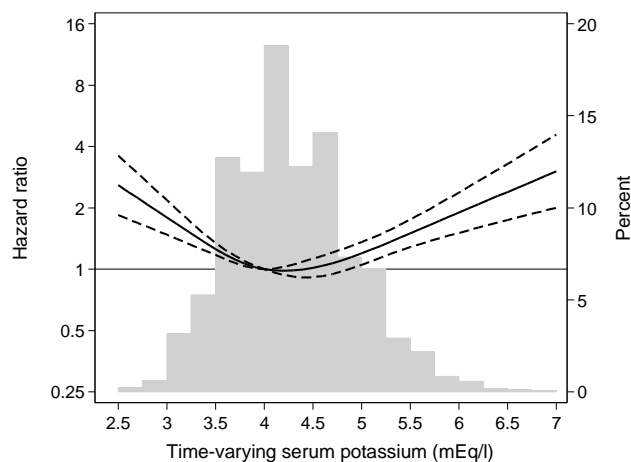

**B** Non-Hispanic black

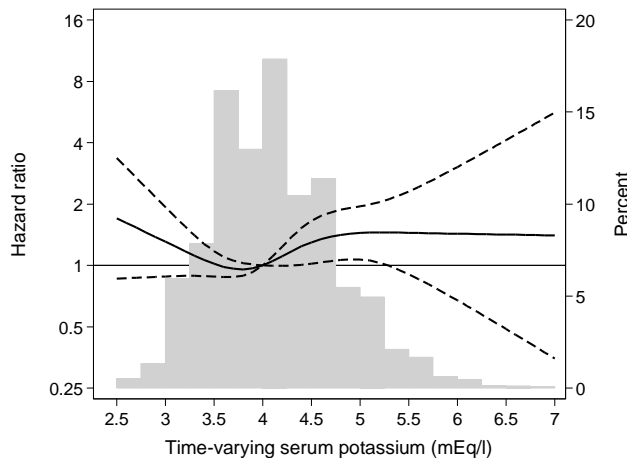

**C** Hispanic

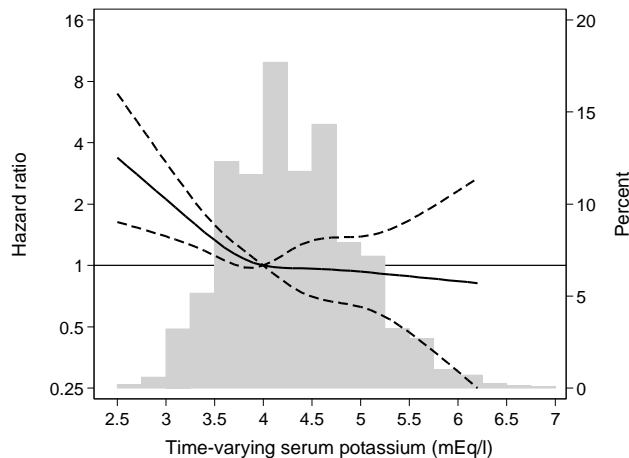

Appendix-Figure S4

**A** Non-Hispanic white

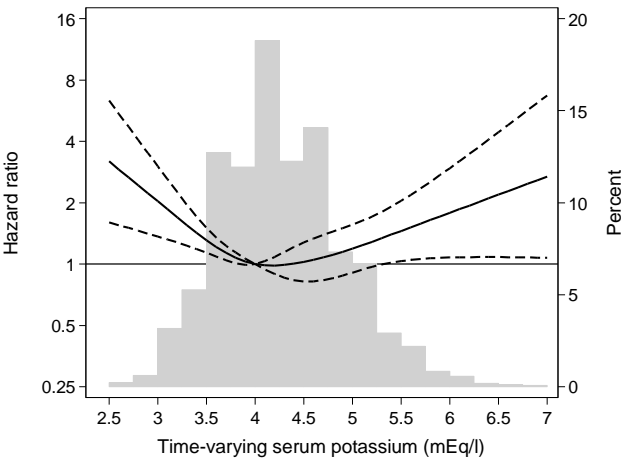

**B** Non-Hispanic black

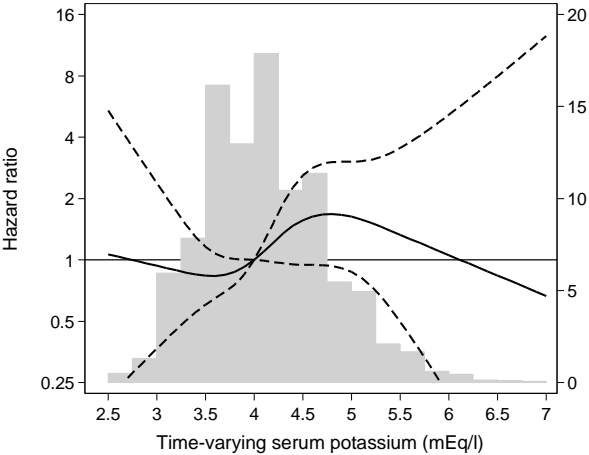

**C** Hispanic

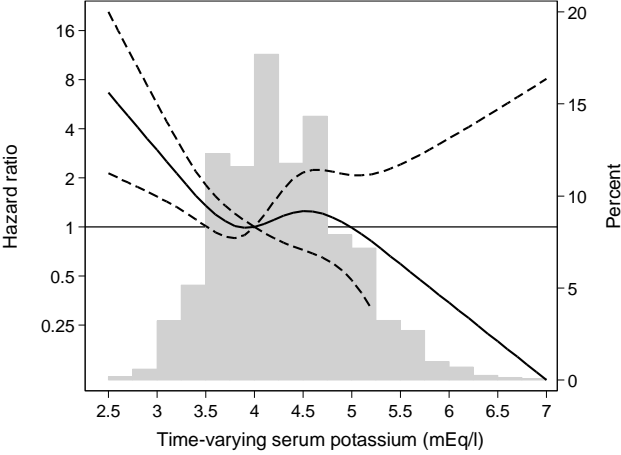

Appendix-Figure S5

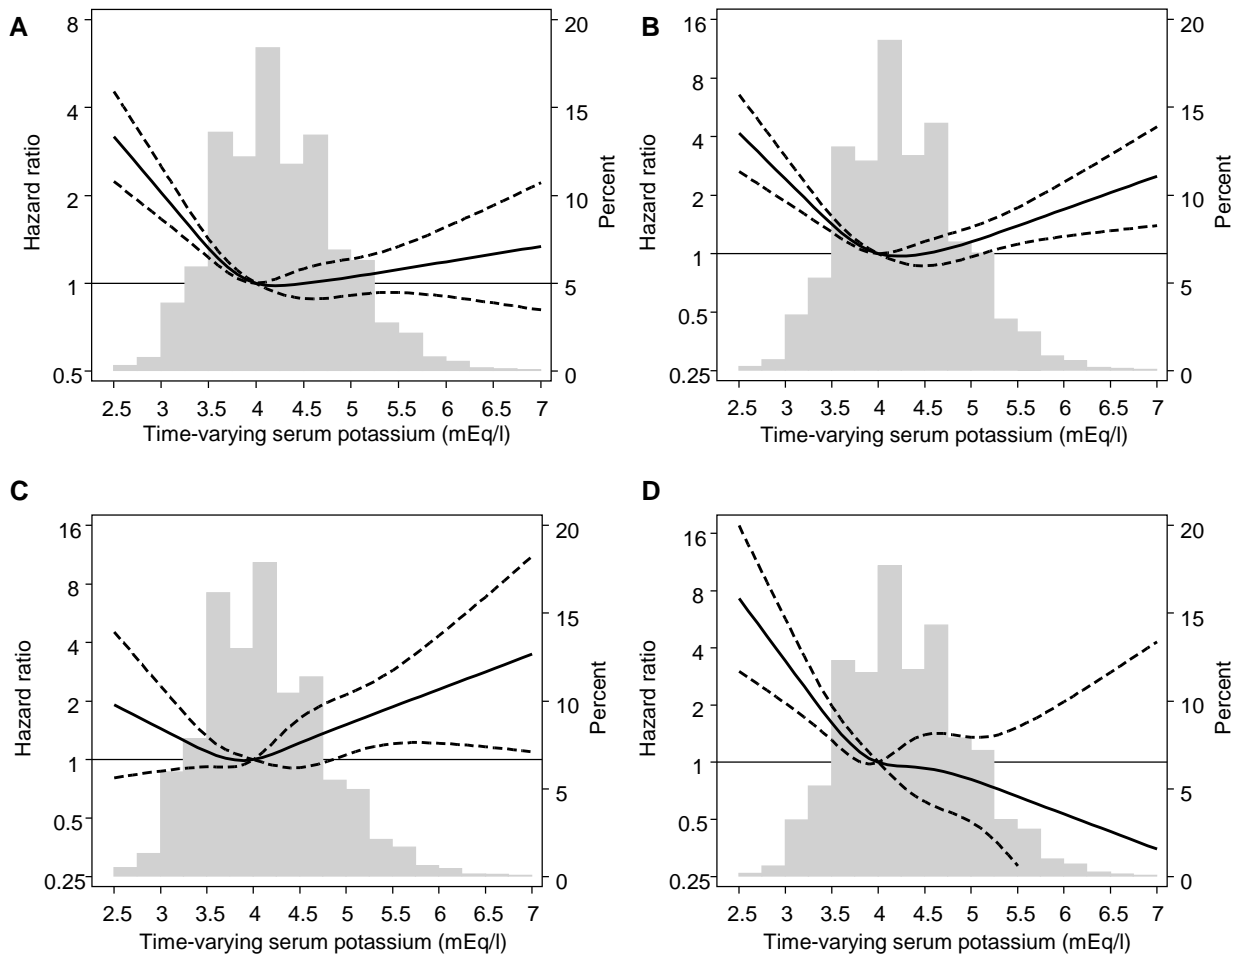

Supplement: Supplementary file 1 [file 1]
