# Supplementary material
Source: publisher figshare collection journal article supplement (https://karger.figshare.com/articles/dataset/_/9821207)
Supplement: Supplementary file 2 [file 1]

Archive with 2 entries (2 files):
- 502998_sm2.pdf
- 502998_sm1.pdf
