# Supplementary material
Source: publisher figshare collection journal article supplement (https://karger.figshare.com/articles/dataset/_/9821207)
Supplement: Supplementary file 2 [file 1 › 502998_sm1.pdf]

## Supplement Figure legends

**Appendix-Figure S1.** Cohort construction. Abbreviations: PD, peritoneal dialysis.

**Appendix-Figure S2.** Frequency of serum potassium measurement at each month from PD start. Abbreviations: PD, peritoneal dialysis.

**Appendix-Figure S3.** Distribution of baseline serum potassium levels and the association of monthly-averaged serum potassium levels with all-cause mortality across race/ethnicity in the case-mix, serum creatinine, Kt/V, and residual renal function adjusted model; (A) non-Hispanic white, (B) non-Hispanic black, and (C) Hispanic patients. Dashed and solid lines represent HRs estimates and 95% CIs, respectively.

**Appendix-Figure S4.** Distribution of baseline serum potassium levels and the association of monthly-averaged serum potassium levels with arrhythmia-related mortality across race/ethnicity in the case-mix, serum creatinine, Kt/V, and residual renal function adjusted model; (A) non-Hispanic white, (B) non-Hispanic black, and (C) Hispanic patients. Dashed and solid lines represent HRs estimates and 95% CIs, respectively.

**Appendix-Figure S5.** Distribution of baseline serum potassium levels and the association between monthly-averaged serum potassium levels and cardiac death across race/ethnicity in the case-mix adjusted model; (A) all patients, (B) non-Hispanic whites, (C) non-Hispanic blacks, and (D) Hispanics. Dashed and solid lines represent HRs estimates and 95% CIs, respectively.
